# Supplementary material for: Electroacupuncture attenuates spared nerve injury-induced neuropathic pain possibly by promoting the progression of AMPK/mTOR-mediated autophagy in spinal microglia
Source: PubMed Central journal article supplement — Ann Transl Med. 2022 Dec;10(23):1278. doi: 10.21037/atm-22-5273 (PMC9816825; doi:10.21037/atm-22-5273), 2022-12
Supplement: atm-10-23-1278-dss.pdf [file atm-10-23-1278-dss.pdf]

## Data Sharing Statement

|                     |                                                                                                                                                     |                                                                                                                  |
|---------------------|-----------------------------------------------------------------------------------------------------------------------------------------------------|------------------------------------------------------------------------------------------------------------------|
| <b>Article Info</b> | <a href="https://dx.doi.org/10.21037/atm-22-5273">https://dx.doi.org/10.21037/atm-22-5273</a>                                                       |                                                                                                                  |
| <b>Item</b>         | <b>Question</b>                                                                                                                                     | <b>Authors' Response<br/>(place "-" if not applicable)</b>                                                       |
| 1                   | Would you like to share data collected for your study to others?                                                                                    | Yes                                                                                                              |
| 2                   | If not, would you like to share the reason for your decision?                                                                                       | -                                                                                                                |
| 3                   | What data in particular will be shared?                                                                                                             | Experimental results in rats can be shared.                                                                      |
| 4                   | Any other documents will be shared? Such as study protocol, statistical analysis plan, informed consent form, clinical study report, analytic code. | Study protocol and statistical analysis plan will also be shared if required.                                    |
| 5                   | When will data availability begin?                                                                                                                  | When the article is published online.                                                                            |
| 6                   | When will data availability end?                                                                                                                    | Two years within the publication date.                                                                           |
| 7                   | To whom will you share the data?                                                                                                                    | Any researchers interested in analgesic effect of electroacupuncture on neuropathic pain.                        |
| 8                   | For what type of analysis or purpose?                                                                                                               | It can be used to study the analgesic effect of electroacupuncture on neuropathic pain.                          |
| 9                   | How or where can the data/documents be obtained?                                                                                                    | By email: twq1972@163.com                                                                                        |
| 10                  | Any other restrictions?                                                                                                                             | We may balance the potential benefits and risks for each request and then provide the data that could be shared. |
